# Supplementary material
Source: Springer Nature journal article supplement (https://www.springermedizin.de/resource/supplementary/12885_2013_3907_MOESM5_ESM.pdf/9464732)

**Time 0****Time 18h****A**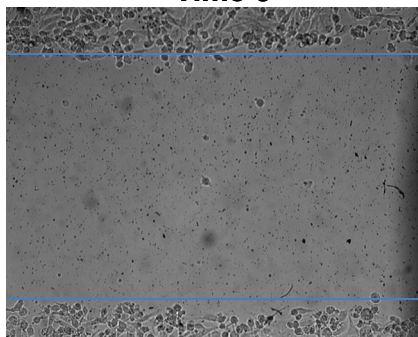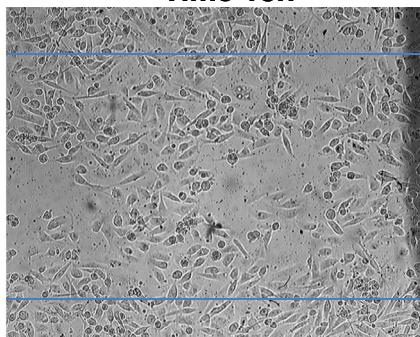**B**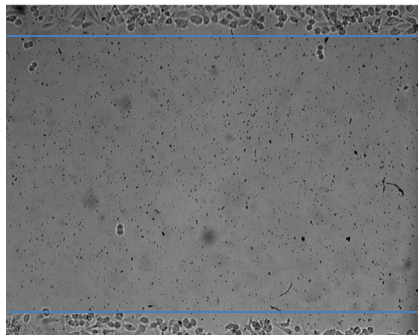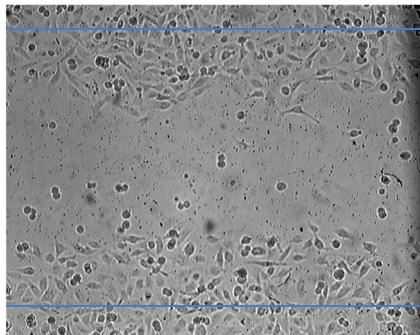**C**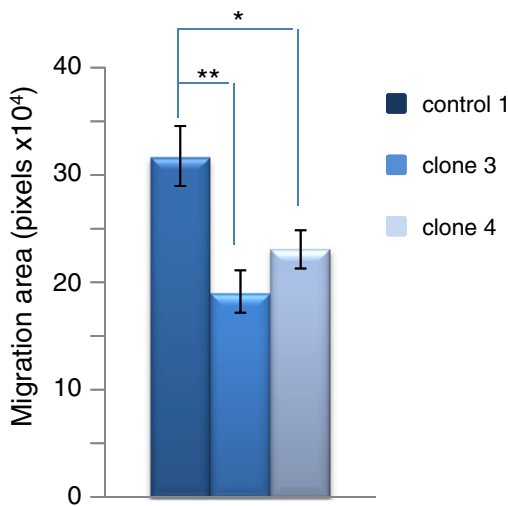

Supplement: MOESM5 [file 9464732]
